# Supplementary material for: Drug Injection-Related and Sexual Behavior Changes in Drug Injecting Networks after the Transmission Reduction Intervention Project (TRIP): A Social Network-Based Study in Athens, Greece
Source: PubMed Central journal article supplement (PMC7967732; doi:10.3390/ijerph18052388), 2021-03-01
Supplement: ijerph-18-02388-s001.pdf [file ijerph-18-02388-s001.pdf]

## Supplementary material

**Table S1:** Questionnaire used for the interviews in the Transmission Reduction Intervention Project.

All questionnaire items have reference to the period during the past six months of the interview.

| Questionnaire items (Q) and Responses (R) |                                                                                                                                                                                                                                                                                                                                                                                                                                                                                                                                                                                                                                                                                                                                                                                           |
|-------------------------------------------|-------------------------------------------------------------------------------------------------------------------------------------------------------------------------------------------------------------------------------------------------------------------------------------------------------------------------------------------------------------------------------------------------------------------------------------------------------------------------------------------------------------------------------------------------------------------------------------------------------------------------------------------------------------------------------------------------------------------------------------------------------------------------------------------|
| Drug injection status                     |                                                                                                                                                                                                                                                                                                                                                                                                                                                                                                                                                                                                                                                                                                                                                                                           |
| Q1                                        | Have you injected drugs, or had someone other than an accredited professional inject you with any drugs?                                                                                                                                                                                                                                                                                                                                                                                                                                                                                                                                                                                                                                                                                  |
| R1                                        | a) Yes                                      b) No                                                                                                                                                                                                                                                                                                                                                                                                                                                                                                                                                                                                                                                                                                                                         |
| Drug injection-related behaviors          |                                                                                                                                                                                                                                                                                                                                                                                                                                                                                                                                                                                                                                                                                                                                                                                           |
| Q2                                        | How many different people did you inject drugs with?                                                                                                                                                                                                                                                                                                                                                                                                                                                                                                                                                                                                                                                                                                                                      |
| R2                                        | Define number: .....                                                                                                                                                                                                                                                                                                                                                                                                                                                                                                                                                                                                                                                                                                                                                                      |
| Q3                                        | How often did you inject drugs? This includes occasions when someone else injected you.                                                                                                                                                                                                                                                                                                                                                                                                                                                                                                                                                                                                                                                                                                   |
| R3                                        | a) Never                                      b) Only a few times                                      c) 1-3 times/month<br>d) About once/week                                      e) 2-5 times/week                                      f) About once/day<br>g) 2 to 3 times/day, almost every day                                      h) 4 to 9 times/day, almost every day                                      i) 10+ times/day, almost every day                                                                                                                                                                                                                                                                                                                                 |
| Q4                                        | When you injected drugs, what proportion of the time did you:                                                                                                                                                                                                                                                                                                                                                                                                                                                                                                                                                                                                                                                                                                                             |
| R4                                        | a) share a syringe that someone else had previously used to inject?<br>b) give someone a syringe to use that you already injected with?<br>c) share a cooker, filter or rinse water that someone else had previously used to inject?<br>d) give someone a cooker, filter or rinse water that you had previously used to inject?<br>e) backload (piggy-back) to share injection drugs?<br>a) None of the time                                      b) Very little                                      c) Less than half<br>d) About half                                      e) More than half                                      f) Almost all<br>g) All                                      h) Not applicable                                      i) Not asked<br>j) Does not know |
| Sexual behaviors                          |                                                                                                                                                                                                                                                                                                                                                                                                                                                                                                                                                                                                                                                                                                                                                                                           |
| <u>For men:</u>                           |                                                                                                                                                                                                                                                                                                                                                                                                                                                                                                                                                                                                                                                                                                                                                                                           |
| Q5                                        | How many different women have you had vaginal or anal sex (total)?                                                                                                                                                                                                                                                                                                                                                                                                                                                                                                                                                                                                                                                                                                                        |
| R5                                        | Define number: .....                                                                                                                                                                                                                                                                                                                                                                                                                                                                                                                                                                                                                                                                                                                                                                      |
| Q6                                        | How many of these women did you always use condoms with?                                                                                                                                                                                                                                                                                                                                                                                                                                                                                                                                                                                                                                                                                                                                  |
| R6                                        | Define number: .....                                                                                                                                                                                                                                                                                                                                                                                                                                                                                                                                                                                                                                                                                                                                                                      |
| <u>For women:</u>                         |                                                                                                                                                                                                                                                                                                                                                                                                                                                                                                                                                                                                                                                                                                                                                                                           |
| Q7                                        | How many different men have you had vaginal or anal sex with?                                                                                                                                                                                                                                                                                                                                                                                                                                                                                                                                                                                                                                                                                                                             |
| R7                                        | Define number: .....                                                                                                                                                                                                                                                                                                                                                                                                                                                                                                                                                                                                                                                                                                                                                                      |
| Q8                                        | How many of these men (total) did you always use condoms with?                                                                                                                                                                                                                                                                                                                                                                                                                                                                                                                                                                                                                                                                                                                            |
| R8                                        | Define number: .....                                                                                                                                                                                                                                                                                                                                                                                                                                                                                                                                                                                                                                                                                                                                                                      |

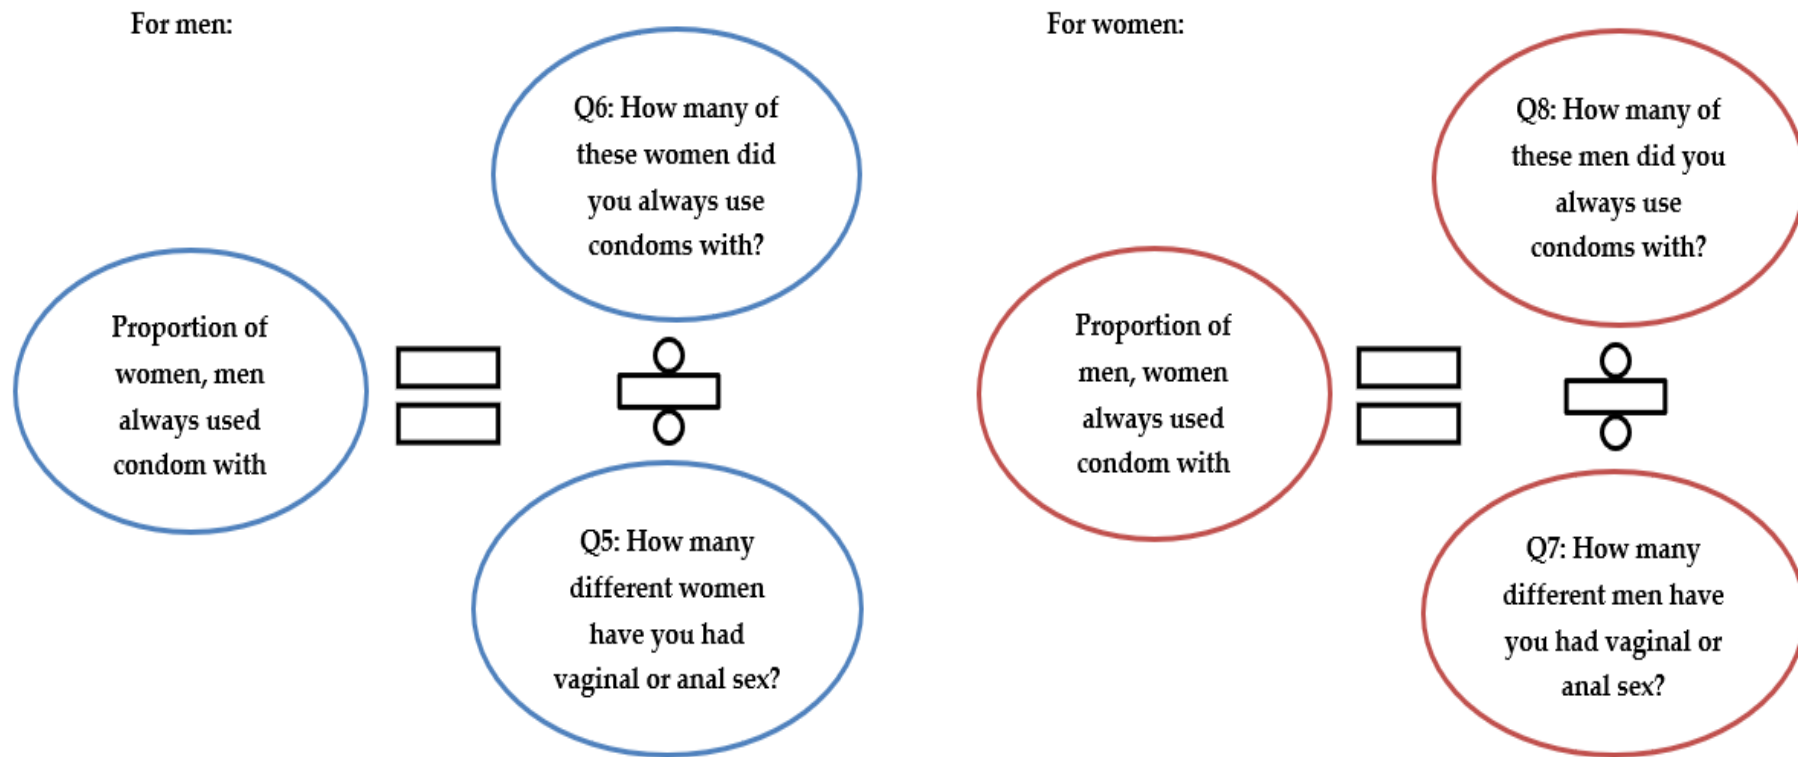

**Figure S1:** Combination of questions for proportions of heterosexual sex partners who the participants of TRIP (Transmission Reduction Intervention Project) had safe sex with during the past six months.

**Table S2:** Sociodemographic characteristics of the participants of Transmission Reduction Intervention Project (TRIP) (n=357) who were followed-up and lost to follow-up six months after their recruitment.

| Sociodemographic characteristic |                                                  | Followed-up<br>[n (%)] | Lost to follow-up<br>[n (%)] | P-value |
|---------------------------------|--------------------------------------------------|------------------------|------------------------------|---------|
| Overall                         |                                                  | 292 (81.8)             | 65 (18.2)                    | -       |
| Gender                          | Male                                             | 231 (79.1)             | 51 (78.5)                    | 0.908   |
|                                 | Female                                           | 61 (20.9)              | 14 (21.5)                    |         |
| Age                             | median (IQR)                                     | 35 (31-41)             | 35 (31-44)                   | 0.751   |
| Nationality                     | Greek                                            | 269 (92.1)             | 54 (83.1)                    | 0.025   |
|                                 | Non-Greek                                        | 23 (7.9)               | 11 (16.9)                    |         |
| Education                       | Up-to high school                                | 249 (85.3)             | 60 (92.3)                    | 0.133   |
|                                 | Post high School                                 | 43 (14.7)              | 5 (7.7)                      |         |
| Employment                      | Employed                                         | 241 (82.5)             | 55 (84.6)                    | 0.687   |
|                                 | Unemployed                                       | 51 (17.5)              | 10 (15.4)                    |         |
| Homelessness                    | Homeless                                         | 56 (19.2)              | 25 (38.5)                    | 0.001   |
|                                 | Non-homeless                                     | 235 (80.8)             | 40 (61.5)                    |         |
| HIV status                      | Positive                                         | 122 (41.8)             | 28 (43.1)                    | 0.848   |
|                                 | Negative                                         | 170 (58.2)             | 37 (56.9)                    |         |
| Participant group               | Recent Seeds (RS)                                | 22 (7.5)               | 1 (1.5)                      | 0.030   |
|                                 | Control Seeds with Long-term HIV infection (LCS) | 17 (5.8)               | 2 (3.1)                      |         |
|                                 | Network of RS                                    | 136 (46.6)             | 35 (53.9)                    |         |
|                                 | Network of LCS                                   | 47 (16.1)              | 18 (27.7)                    |         |
|                                 | Negative controls                                | 70 (24.0)              | 9 (13.9)                     |         |

The Chi-squared test was used to test the difference between frequencies and the Wilcoxon rank-sum (Mann-Whitney) test was used to test the difference in age distribution.

P-values in italics stand for statistically significant differences between groups ( $p < 0.05$ ).

Abbreviations: IQR, Interquartile range; SD, standard deviation; RS, recent seeds; LCS, control seeds with long-term HIV infection.

**Table S3:** Frequencies and percentages (in parentheses) of the responses to questionnaire item Q1 (Have you injected drugs, or had someone other than an accredited professional inject you with any drugs?) (n=292), at baseline and follow-up of Transmission Reduction Intervention Project (TRIP).

| Sociodemographic characteristics |                   | Drug injection status [n (%)] |               |              |            |            |            |                |            | P-value |
|----------------------------------|-------------------|-------------------------------|---------------|--------------|------------|------------|------------|----------------|------------|---------|
|                                  |                   | Baseline                      |               |              |            | Follow up  |            |                |            |         |
|                                  |                   | Injecting                     | Non-injecting | Started      | Continued  | Total      | Stopped    | Continued      | Total      |         |
| Overall                          |                   | 270 (92.5)                    | 22 (7.5)      | 6 (2.1)      | 205 (70.2) | 211 (72.3) | 65 (22.3)  | 16 (5.5)       | 81 (27.7)  | <0.001  |
| Gender                           | Male              | 217 (80.4)                    | 14 (63.6)     | 6 (100)      | 168 (82.0) | 174 (82.5) | 49 (75.4)  | 8 (50.0)       | 57 (70.4)  | <0.001  |
|                                  | Female            | 53 (19.6)                     | 8 (36.4)      | 0 (0.0)      | 37 (18.0)  | 37 (17.5)  | 16 (24.6)  | 8 (50.0)       | 24 (29.6)  | <0.001  |
| Age                              | median (IQR)      | 35 (31-40)                    | 37.5 (30-44)  | 38.5 (37-42) | 35 (31-40) | 35 (31-40) | 35 (32-42) | 35 (29.5-44.5) | 35 (32-44) | 0.279   |
| Nationality                      | Greek             | 247 (91.5)                    | 22 (100)      | 6 (100)      | 184 (89.8) | 190 (90.1) | 63 (96.9)  | 16 (100)       | 79 (97.5)  | <0.001  |
|                                  | Non-Greek         | 23 (8.5)                      | 0 (0.0)       | 0 (0.0)      | 21 (10.2)  | 9 (9.9)    | 2 (3.1)    | 0 (0.0)        | 2 (2.5)    | 0.500   |
| Education                        | Up-to high school | 234 (86.7)                    | 16 (72.7)     | 6 (100)      | 178 (86.8) | 184 (87.2) | 56 (86.2)  | 10 (62.5)      | 66 (81.5)  | <0.001  |
|                                  | Post high school  | 36 (13.3)                     | 6 (27.3)      | 0 (0.0)      | 27 (13.2)  | 27 (12.8)  | 9 (13.8)   | 6 (37.5)       | 15 (18.5)  | 0.004   |
| Employment <sup>1</sup>          | Employed          | 47 (17.4)                     | 13 (59.1)     | 1 (16.7)     | 28 (13.7)  | 29 (13.7)  | 19 (29.2)  | 12 (75.0)      | 31 (38.3)  | <0.001  |
|                                  | Unemployed        | 223 (82.6)                    | 9 (40.9)      | 5 (83.3)     | 177 (86.3) | 182 (86.3) | 46 (70.8)  | 4 (25.0)       | 50 (61.7)  | <0.001  |
| Homelessness <sup>1</sup>        | Homeless          | 35 (13.0)                     | 4 (18.2)      | 3 (50.0)     | 31 (15.2)  | 34 (16.2)  | 4 (6.1)    | 1 (6.3)        | 5 (6.2)    | 1.000   |
|                                  | Non-homeless      | 234 (87.0)                    | 18 (81.8)     | 3 (50.0)     | 173 (84.8) | 176 (83.8) | 61 (93.9)  | 15 (93.8)      | 76 (93.8)  | <0.001  |
| HIV status                       | Positive          | 119 (44.1)                    | 3 (13.6)      | 1 (16.7)     | 107 (52.2) | 108 (48.8) | 12 (18.5)  | 2 (12.5)       | 14 (17.3)  | 0.003   |
|                                  | Negative          | 151 (55.9)                    | 19 (86.4)     | 5 (83.3)     | 98 (47.8)  | 103 (51.2) | 53 (81.5)  | 14 (87.5)      | 67 (82.7)  | <0.001  |
| Participant group                | RS                | 22 (8.2)                      | 0 (0.0)       | 0 (0.0)      | 18 (8.8)   | 18 (8.5)   | 4 (6.2)    | 0 (0.0)        | 4 (4.9)    | 0.125   |
|                                  | LCS               | 17 (6.3)                      | 0 (0.0)       | 0 (0.0)      | 13 (6.3)   | 13 (6.2)   | 4 (6.2)    | 0 (0.0)        | 4 (4.9)    | 0.125   |
|                                  | Network of RS     | 118 (43.7)                    | 18 (81.8)     | 5 (83.3)     | 102 (49.8) | 107 (50.7) | 16 (24.6)  | 13 (81.3)      | 29 (35.8)  | 0.027   |
|                                  | Network of LCS    | 43 (15.9)                     | 4 (18.2)      | 1 (16.7)     | 37 (18.0)  | 38 (18.0)  | 6 (9.2)    | 3 (18.7)       | 9 (11.1)   | 0.125   |
|                                  | Negative controls | 70 (25.9)                     | 0 (0.0)       | 0 (0.0)      | 35 (17.1)  | 35 (16.6)  | 35 (53.8)  | 0 (0.0)        | 35 (43.2)  | <0.001  |

The Exact McNemar significance probability test was used to test the difference of the matched pairs in injecting *versus* non-injecting at baseline and follow-up and the Kruskal-Wallis equality-of-populations rank test was used to test a difference in the age distribution.

P-values in italics stand for statistically significant differences between groups (p<0.05).

<sup>1</sup> Employment and homelessness status at the time of follow-up.

Abbreviations: IQR, Interquartile range; RS, recent seeds; LCS, control seeds with long-term HIV infection.

**Table S4:** Sociodemographic characteristics of people who injected drug at baseline of Transmission Reduction Intervention Project (TRIP) (n=270). Comparison of those who stopped injecting and continued injecting drugs at follow-up.

| Sociodemographic characteristics |                   | Drug injection status at follow-up [n (%)] |            |       | P-value |
|----------------------------------|-------------------|--------------------------------------------|------------|-------|---------|
|                                  |                   | Continued                                  | Stopped    | Total |         |
| Overall                          |                   | 205 (75.9)                                 | 65 (24.1)  | 270   |         |
| Gender                           | Male              | 168 (77.4)                                 | 49 (22.6)  | 217   | 0.245   |
|                                  | Female            | 37 (69.8)                                  | 16 (30.2)  | 53    |         |
| Age                              | Median (IQR)      | 35 (31-40)                                 | 35 (32-42) |       | 0.056   |
| Nationality                      | Greek             | 184 (74.5)                                 | 63 (25.5)  | 247   | 0.071   |
|                                  | Non-Greek         | 21 (91.3)                                  | 2 (8.7)    | 23    |         |
| Education                        | Up-to high school | 178 (76.1)                                 | 56 (23.9)  | 234   | 0.889   |
|                                  | Post high School  | 27 (75.0)                                  | 9 (25.0)   | 36    |         |
| Employment                       | Employed          | 28 (59.6%)                                 | 19 (40.4%) | 47    | 0.004   |
|                                  | Unemployed        | 177 (79.4)                                 | 46 (20.6)  | 223   |         |
| Homelessness                     | Homeless          | 31 (88.6)                                  | 4 (11.4)   | 35    | 0.059   |
|                                  | Non-homeless      | 173 (73.9)                                 | 61 (26.1)  | 234   |         |
| HIV status                       | Positive          | 107 (89.9)                                 | 12 (10.1)  | 119   | <0.001  |
|                                  | Negative          | 98 (64.9)                                  | 53 (35.1)  | 151   |         |
| Participant group                | RS                | 18 (81.8)                                  | 4 (18.2)   | 22    | <0.001  |
|                                  | LCS               | 13 (76.5)                                  | 4 (23.5)   | 17    |         |
|                                  | Network of RS     | 102 (86.4)                                 | 16 (13.6)  | 118   |         |
|                                  | Network of LCS    | 37 (86.0)                                  | 6 (14.0)   | 43    |         |
|                                  | Negative controls | 35 (50.0)                                  | 35 (50.0)  | 70    |         |

The Chi-squared test was used for the comparisons, except for age where a Wilcoxon rank-sum (Mann-Whitney) test was used to test the difference in age distribution.

P-values in italics stand for statistically significant differences between groups ( $p < 0.05$ ).

Abbreviations: IQR, Interquartile range; SD, standard deviation; RS, recent seeds; LCS, control seeds with long-term HIV infection.

**Table S5:** Odds ratios (OR) and 95% Confidence Intervals (CI) for injecting drug use at follow-up (A) (all participants) and (B) for stopping injecting drug use at follow-up (participant who injected at baseline) - Transmission Reduction Intervention Project (TRIP).

| Factors                                                   | Q1: Have you injected drugs, or had someone other than an accredited professional inject you with any drugs? |                              |                             |                            |                            |
|-----------------------------------------------------------|--------------------------------------------------------------------------------------------------------------|------------------------------|-----------------------------|----------------------------|----------------------------|
|                                                           | A                                                                                                            |                              | B                           |                            |                            |
|                                                           | Univariable                                                                                                  | Multivariable                | Univariable                 | Multivariable              |                            |
| Response at baseline                                      | <b>8.410 (3.160-22.383)</b>                                                                                  | <b>10.576 (3.346-33.433)</b> | -                           | -                          |                            |
| Gender (Females vs males)                                 | <b>0.505 (0.279-0.915)</b>                                                                                   | <b>0.399 (0.195-0.819)</b>   | 1.482 (0.761-2.889)         | -                          |                            |
| Age                                                       | <b>0.962 (0.933-0.993)</b>                                                                                   | 0.966 (0.930-1.004)          | <b>1.043 (1.006-1.081)</b>  | 1.032 (0.991-1.074)        |                            |
| Education<br>(Post vs up-to high School)                  | 0.646 (0.324-1.289)                                                                                          | -                            | 1.060 (0.470-2.386)         | -                          |                            |
| Employment<br>(Unemployed vs employed)                    | <b>3.891 (2.146-7.056)</b>                                                                                   | <b>2.706 (1.332-5.495)</b>   | <b>0.383 (0.197-0.746)</b>  | <b>0.475 (0.228-0.988)</b> |                            |
| Homelessness<br>(Homeless vs non-homeless)                | <b>2.936 (1.106-7.797)</b>                                                                                   | 2.024 (0.659-6.218)          | 0.366 (0.124-1.079)         | -                          |                            |
| HIV status <sup>1</sup><br>(Positive vs negative)         | <b>5.018 (2.656-9.479)</b>                                                                                   | -                            | <b>0.207 (0.105-0.411)</b>  | -                          |                            |
| Participant group<br>(reference group: negative controls) | RS                                                                                                           | 4.500 (1.382-14.650)         | <b>4.420 (1.298-15.052)</b> | <b>0.222 (0.068-0.723)</b> | <b>0.233 (0.070-0.778)</b> |
|                                                           | LCS                                                                                                          | 3.250 (0.965-10.950)         | 2.780 (0.791-9.773)         | 0.308 (0.091-1.037)        | 0.344 (0.100-1.175)        |
|                                                           | Network of RS                                                                                                | <b>3.690 (1.979-6.878)</b>   | <b>4.903 (2.348-10.239)</b> | <b>0.157 (0.077-0.318)</b> | <b>0.186 (0.090-0.382)</b> |
|                                                           | Network of LCS                                                                                               | <b>4.222 (1.779-10.023)</b>  | <b>5.369 (1.965-14.671)</b> | <b>0.162 (0.061-0.433)</b> | <b>0.185 (0.068-0.502)</b> |

Binary logistic regression used for the Odds Ratio (95% CI) of answering *yes* versus *no* at follow-up. Factors (except for participant group) non-significantly related to injecting drug use in univariable logistic regression analysis were excluded from multivariable analysis.

<sup>1</sup> HIV status was not included in the multivariable logistic regression analysis for participants who stopped injecting drug use in follow-up because of collinearity with participant group.

Odds ratios of variables whose confidence intervals do not include 1 are shown in bold.

Abbreviations: RS, recent seeds; LCS, control seeds with long-term HIV infection.

**Table S6:** Median values and interquartile ranges (IQR) of the number of different people who the participants injected drugs with, at baseline and follow-up of Transmission Reduction Intervention Project (TRIP).

| <b>Q2: How many different people did you inject drugs with? (n=204)</b> |                                                  |                 |                  |                |
|-------------------------------------------------------------------------|--------------------------------------------------|-----------------|------------------|----------------|
|                                                                         |                                                  | <b>Baseline</b> | <b>Follow-up</b> | <b>P-value</b> |
|                                                                         |                                                  | <b>[n (%)]</b>  | <b>[n (%)]</b>   |                |
| Overall                                                                 |                                                  | 4 (2-7.5)       | 3.5 (1-10)       | 0.896          |
| HIV Status                                                              | Positive                                         | 4 (3-7)         | 4 (1-10)         | 0.947          |
|                                                                         | Negative                                         | 4 (2-10)        | 3 (1-10)         | 0.893          |
| Participant group                                                       | Recent Seeds (RS)                                | 3.5 (1-5)       | 4 (1-7)          | 0.230          |
|                                                                         | Control Seeds with Long-term HIV infection (LCS) | 3 (3-7.5)       | 2.5 (0.5-5.5)    | 0.077          |
|                                                                         | Network of RS                                    | 4 (2-7)         | 3 (1-10)         | 0.611          |
|                                                                         | Network of LCS                                   | 6 (4-10)        | 6 (2-20)         | 0.826          |
|                                                                         | Negative controls                                | 3 (1-10)        | 3 (1-10)         | 0.699          |

The Wilcoxon signed-rank test was used to test the difference of the matched pairs at baseline versus follow-up.

Abbreviations: RS, recent seeds; LCS, control seeds with long-term HIV infection.

**Table S7:** Frequencies and percentages (in parentheses) of the responses to questionnaire item Q4a: When you injected drugs, what proportion of the time did you share a syringe someone else had previously used to inject? (n=203) at baseline and at follow-up of Transmission Reduction Intervention Project (TRIP).

|                   |                                                  |           | Drug injection-related behavior (Q4a) |                |              |
|-------------------|--------------------------------------------------|-----------|---------------------------------------|----------------|--------------|
|                   |                                                  |           | Safe [n, (%)]                         | Risky [n, (%)] | P-value      |
| Overall           |                                                  | Baseline  | 133 (65.5)                            | 70 (34.5)      | <i>0.007</i> |
|                   |                                                  | Follow-up | 155 (76.4)                            | 48 (23.7)      |              |
| HIV Status        | Positive                                         | Baseline  | 66 (62.3)                             | 40 (37.7)      | <i>0.029</i> |
|                   |                                                  | Follow-up | 80 (75.5)                             | 26 (24.5)      |              |
|                   | Negative                                         | Baseline  | 67 (69.1)                             | 30 (30.9)      | <i>0.169</i> |
|                   |                                                  | Follow-up | 75 (77.3)                             | 22 (22.7)      |              |
| Participant group | Recent Seeds (RS)                                | Baseline  | 11 (61.1)                             | 7 (38.9)       | <i>0.250</i> |
|                   |                                                  | Follow-up | 14 (77.8)                             | 4 (22.2)       |              |
|                   | Control Seeds with Long-term HIV infection (LCS) | Baseline  | 8 (66.7)                              | 4 (33.3)       | <i>1.000</i> |
|                   |                                                  | Follow-up | 9 (75.0)                              | 3 (25.0)       |              |
|                   | Network of RS                                    | Baseline  | 65 (64.4)                             | 36 (35.6)      | <i>0.007</i> |
|                   |                                                  | Follow-up | 81 (80.2)                             | 20 (19.8)      |              |
|                   | Network of LCS                                   | Baseline  | 21 (56.8)                             | 16 (43.2)      | <i>0.804</i> |
|                   |                                                  | Follow-up | 23 (62.2)                             | 14 (37.8)      |              |
| Negative controls | Baseline                                         | 28 (80.0) | 7 (20.0)                              | <i>1.000</i>   |              |
|                   | Follow-up                                        | 28 (80.0) | 7 (20.0)                              |                |              |

The responses were collapsed into the categories, safe (none of the time) and risky (very little; less than half; about half; more than half; almost all; all) behavior. The Exact McNemar significance probability test was used to test the difference of the matched pairs in baseline versus follow-up.

P-values in italics stand for statistically significant differences between groups ( $p < 0.05$ ).

Abbreviations: RS, recent seeds; LCS, control seeds with long-term HIV infection.



**Table S8:** Frequencies and percentages (in parentheses) of the responses to questionnaire item Q4b: When you injected drugs, what proportion of the time did you give someone a syringe to use that you already injected with? (n=202), at baseline and at follow-up of Transmission Reduction Intervention Project (TRIP).

|                   |                                                  |           | Drug injection-related behavior (Q4b) |                |              |
|-------------------|--------------------------------------------------|-----------|---------------------------------------|----------------|--------------|
|                   |                                                  |           | Safe [n, (%)]                         | Risky [n, (%)] | P-value      |
| Overall           |                                                  | Baseline  | 127 (62.9)                            | 75 (37.1)      | <i>0.002</i> |
|                   |                                                  | Follow-up | 153 (75.7)                            | 49 (24.3)      |              |
| HIV Status        | Positive                                         | Baseline  | 74 (70.5)                             | 31 (29.5)      | <i>0.035</i> |
|                   |                                                  | Follow-up | 87 (82.9)                             | 18 (44.4)      |              |
|                   | Negative                                         | Baseline  | 53 (54.6)                             | 44 (45.4)      | 0.035        |
|                   |                                                  | Follow-up | 66 (68.0)                             | 31 (32.0)      |              |
| Participant group | Recent Seeds (RS)                                | Baseline  | 12 (66.7)                             | 6 (33.3)       | 0.453        |
|                   |                                                  | Follow-up | 15 (83.3)                             | 3 (16.7)       |              |
|                   | Control Seeds with Long-term HIV infection (LCS) | Baseline  | 9 (81.8)                              | 2 (18.2)       | 1.000        |
|                   |                                                  | Follow-up | 9 (81.8)                              | 2 (18.2)       |              |
|                   | Network of RS                                    | Baseline  | 59 (58.4)                             | 42 (41.6)      | <i>0.005</i> |
|                   |                                                  | Follow-up | 76 (75.3)                             | 25 (24.8)      |              |
|                   | Network of LCS                                   | Baseline  | 24 (64.9)                             | 13 (35.1)      | 0.791        |
|                   |                                                  | Follow-up | 26 (70.3)                             | 11 (29.7)      |              |
|                   | Negative controls                                | Baseline  | 23 (65.7)                             | 12 (34.3)      | 0.344        |
|                   |                                                  | Follow-up | 27 (77.1)                             | 8 (22.9)       |              |

The responses were collapsed into the categories, safe (none of the time) and risky (very little; less than half; about half; more than half; almost all; all) behavior.

The Exact McNemar significance probability test was used to test the difference of the matched pairs in baseline versus follow-up.

P-values in italics stand for statistically significant differences between groups ( $p < 0.05$ ).

Abbreviations: RS, recent seeds; LCS, control seeds with long-term HIV infection.

**Table S9:** Frequencies and percentages (in parentheses) of the responses to questionnaire item Q4(c): When you injected drugs, what proportion of the time did you share a cooker, filter or rinse water that someone else had previously used to inject? (n=202) at baseline and at follow-up of Transmission Reduction Intervention Project (TRIP).

|                   |                                                  |           | Drug injection-related behavior (Q4c) |                |                  |
|-------------------|--------------------------------------------------|-----------|---------------------------------------|----------------|------------------|
|                   |                                                  |           | Safe [n, (%)]                         | Risky [n, (%)] | P-value          |
| Overall           |                                                  | Baseline  | 78 (38.6)                             | 124 (61.4)     |                  |
|                   |                                                  | Follow-up | 126 (62.4)                            | 76 (37.6)      | <i>&lt;0.001</i> |
| HIV Status        | Positive                                         | Baseline  | 37 (35.2)                             | 68 (64.8)      |                  |
|                   |                                                  | Follow-up | 65 (61.9)                             | 40 (38.1)      | <i>&lt;0.001</i> |
|                   | Negative                                         | Baseline  | 41 (42.3)                             | 56 (57.7)      |                  |
|                   |                                                  | Follow-up | 61 (62.9)                             | 36 (37.1)      | <i>0.002</i>     |
| Participant group | Recent seeds (RS)                                | Baseline  | 6 (33.3)                              | 12 (66.7)      |                  |
|                   |                                                  | Follow-up | 13 (72.2)                             | 5 (27.8)       | <i>0.065</i>     |
|                   | Control Seeds with Long-term HIV infection (LCS) | Baseline  | 6 (54.6)                              | 5 (45.5)       |                  |
|                   |                                                  | Follow-up | 7 (63.6)                              | 4 (36.4)       | <i>1.000</i>     |
|                   | Network of RS                                    | Baseline  | 41 (40.6)                             | 60 (59.4)      |                  |
|                   |                                                  | Follow-up | 68 (67.3)                             | 33 (32.7)      | <i>&lt;0.001</i> |
|                   | Network of LCS                                   | Baseline  | 9 (24.3)                              | 28 (75.7)      |                  |
|                   |                                                  | Follow-up | 17 (46.0)                             | 20 (54.1)      | <i>0.039</i>     |
|                   | Negative controls                                | Baseline  | 16 (45.7)                             | 19 (54.3)      |                  |
|                   |                                                  | Follow-up | 21 (60.0)                             | 14 (40.0)      | <i>0.267</i>     |

The responses were collapsed into the categories, safe (none of the time) and risky (very little; less than half; about half; more than half; almost all; all) behavior.

The Exact McNemar significance probability test was used to test the difference of the matched pairs in baseline versus follow-up.

P-values in italics stand for statistically significant differences between groups ( $p < 0.05$ ).

Abbreviations: RS, recent seeds; LCS, control seeds with long-term HIV infection.

**Table S10:** Frequencies and percentages (in parentheses) of the responses to questionnaire item Q4(d): When you injected drugs, what proportion of the time did you give someone a cooker, filter or rinse water that you had previously used to inject? (n=202), at baseline and at follow-up of Transmission Reduction Intervention Project (TRIP).

|                   |                                                     | Drug injection-related behavior<br>(Q4d) |                |            |                  |
|-------------------|-----------------------------------------------------|------------------------------------------|----------------|------------|------------------|
|                   |                                                     | Safe [n, (%)]                            | Risky [n, (%)] | P-value    |                  |
| Overall           |                                                     | Baseline                                 | 93 (46.0)      | 109 (54.0) | <i>&lt;0.001</i> |
|                   |                                                     | Follow-up                                | 128 (63.4)     | 74 (36.6)  |                  |
| HIV Status        | Positive                                            | Baseline                                 | 53 (50.5)      | 52 (49.5)  | <i>0.002</i>     |
|                   |                                                     | Follow-up                                | 74 (70.5)      | 31 (29.5)  |                  |
|                   | Negative                                            | Baseline                                 | 40 (41.2)      | 57 (58.8)  | <i>0.020</i>     |
|                   |                                                     | Follow-up                                | 54 (55.7)      | 43 (44.3)  |                  |
| Participant group | Recent seeds (RS)                                   | Baseline                                 | 8 (44.4)       | 10 (55.6)  | 0.070            |
|                   |                                                     | Follow-up                                | 14 (77.8)      | 4 (22.2)   |                  |
|                   | Control Seeds with Long-term<br>HIV infection (LCS) | Baseline                                 | 8 (72.7)       | 3 (27.3)   | 1.000            |
|                   |                                                     | Follow-up                                | 9 (81.8)       | 2 (18.2)   |                  |
|                   | Network of RS                                       | Baseline                                 | 48 (47.5)      | 53 (52.5)  | <i>0.004</i>     |
|                   |                                                     | Follow-up                                | 67 (66.3)      | 34 (33.7)  |                  |
|                   | Network of LCS                                      | Baseline                                 | 12 (32.4)      | 25 (67.6)  | 0.267            |
|                   |                                                     | Follow-up                                | 17 (45.9)      | 20 (54.1)  |                  |
|                   | Negative controls                                   | Baseline                                 | 17 (48.6)      | 18 (51.4)  | 0.344            |
|                   |                                                     | Follow-up                                | 21 (60.0)      | 14 (40.0)  |                  |

The responses were collapsed into the categories, safe (none of the time) and risky (very little; less than half; about half; more than half; almost all; all) behavior.

The Exact McNemar significance probability test was used to test the difference of the matched pairs in baseline versus follow-up.

P-values in italics stand for statistically significant differences between groups ( $p < 0.05$ ).

Abbreviations: RS, recent seeds; LCS, control seeds with long-term HIV infection.

**Table S11:** Frequencies and percentages (in parentheses) of the responses to questionnaire item Q4(e): When you injected drugs, what proportion of the time did you backload (piggy-back) to share injection drugs? (n=202), at baseline and at follow-up of Transmission Reduction Intervention Project (TRIP).

|                   |                                                  |           | Drug injection-related behavior (Q4e) |                |                  |
|-------------------|--------------------------------------------------|-----------|---------------------------------------|----------------|------------------|
|                   |                                                  |           | Safe [n, (%)]                         | Risky [n, (%)] | P-value          |
| Overall           |                                                  | Baseline  | 150 (74.3)                            | 52 (25.7)      | <i>&lt;0.001</i> |
|                   |                                                  | Follow-up | 180 (89.1)                            | 22 (10.9)      |                  |
| HIV Status        | Positive                                         | Baseline  | 76 (72.4)                             | 29 (27.6)      | <i>0.004</i>     |
|                   |                                                  | Follow-up | 92 (87.6)                             | 13 (12.4)      |                  |
|                   | Negative                                         | Baseline  | 74 (76.3)                             | 23 (23.7)      | <i>0.003</i>     |
|                   |                                                  | Follow-up | 88 (90.7)                             | 9 (9.3)        |                  |
| Participant group | Recent seeds (RS)                                | Baseline  | 11 (61.1)                             | 7 (38.9)       | <i>0.031</i>     |
|                   |                                                  | Follow-up | 17 (94.4)                             | 1 (5.6)        |                  |
|                   | Control Seeds with Long-term HIV infection (LCS) | Baseline  | 8 (72.7)                              | 3 (27.3)       | 0.250            |
|                   |                                                  | Follow-up | 11 (100)                              | 0 (0.0)        |                  |
|                   | Network of RS                                    | Baseline  | 78 (77.2)                             | 23 (22.8)      | <i>0.007</i>     |
|                   |                                                  | Follow-up | 92 (91.1)                             | 9 (8.9)        |                  |
|                   | Network of LCS                                   | Baseline  | 25 (67.6)                             | 12 (32.4)      | 0.344            |
|                   |                                                  | Follow-up | 29 (78.4)                             | 8 (21.6)       |                  |
|                   | Negative controls                                | Baseline  | 28 (80.0)                             | 7 (20.0)       | 0.375            |
|                   |                                                  | Follow-up | 31 (88.6)                             | 4 (11.4)       |                  |

The responses were collapsed into the categories, safe (none of the time) and risky (very little; less than half; about half; more than half; almost all; all) behavior. The Exact McNemar significance probability test was used to test the difference of the matched pairs in baseline versus follow-up.

P-values in italics stand for statistically significant differences between groups ( $p < 0.05$ ).

Abbreviations: RS, recent seeds; LCS, control seeds with long-term HIV infection.

**Table S12:** Odds ratios (OR) and 95% confidence intervals (CI) of univariable and multivariable logistic regression models for participants responses to questionnaire items of drug injection-related behaviors (safe *versus* risky) at follow-up (Q4b, Q4d, Q4e).

|                                                          |    | Drug injecting related behaviors in follow-up |                        |                        |                         |                         |                         |
|----------------------------------------------------------|----|-----------------------------------------------|------------------------|------------------------|-------------------------|-------------------------|-------------------------|
|                                                          |    | Q4b                                           |                        | Q4d                    |                         | Q4e                     |                         |
| Factors                                                  |    | Univariable                                   | Multivariable          | Univariable            | Multivariable           | Univariable             | Multivariable           |
| Baseline response                                        |    | 3.373<br>(1.732-6.567)                        | 2.814<br>(1.403-5.647) | 3.583<br>(1.926-6.669) | 2.649<br>(1.358-5.168)  | 5.222<br>(2.079-13.116) | 4.686<br>(1.723-12.743) |
| Gender<br>(Females vs males)                             |    | 1.705<br>(0.784-3.708)                        | -                      | 1.435<br>(0.697-2.953) | -                       | 3.133<br>(1.206-8.138)  | 2.934<br>(1.014-8.489)  |
| Age                                                      |    | 0.924<br>(0.879-0.971)                        | 0.947<br>(0.898-0.999) | 0.927<br>(0.888-0.968) | 0.933<br>(0.888-0.980)  | 0.921<br>(0.859-0.988)  | 0.956<br>(0.884-1.033)  |
| Education<br>(Post vs up-to high School)                 |    | 0.903<br>(0.343-2.378)                        | -                      | 1.043<br>(0.451-2.409) | -                       | 0.297<br>(0.038-2.301)  | -                       |
| Employment<br>(Unemployed vs employed)                   |    | 2.029<br>(0.669-6.158)                        | -                      | 2.942<br>(1.070-8.094) | 4.247<br>(1.391-12.972) | 1.605<br>(0.354-7.275)  | -                       |
| Homelessness<br>(Homeless vs non-homeless)               |    | 1.177<br>(0.509-2.721)                        | -                      | 0.946<br>(0.439-2.038) | -                       | 1.602<br>(0.548-4.685)  | -                       |
| HIV status<br>(Positive vs negative)                     |    | 0.449<br>(0.233-0.865)                        | -                      | 0.526<br>(0.297-0.931) | -                       | 1.444<br>(0.589-3.541)  | -                       |
| Participant group (Negative controls as reference group) | RS | 0.675<br>(0.155-2.934)                        | 0.590<br>(0.124-2.816) | 0.429<br>(0.117-1.574) | 0.256<br>(0.060-1.085)  | 0.456<br>(0.047-4.412)  | 0.291<br>(0.027-3.144)  |

|                |                        |                        |                        |                        |                        |                        |
|----------------|------------------------|------------------------|------------------------|------------------------|------------------------|------------------------|
| LCS            | 0.675<br>(0.122-3.736) | 0.830<br>(0.138-5.000) | 0.300<br>(0.057-1.581) | 0.283<br>(0.048-1.682) | -                      | -                      |
| Network of RS  | 1.083<br>(0.439-2.676) | 0.906<br>(0.347-2.362) | 0.729<br>(0.332-1.603) | 0.472<br>(0.191-1.170) | 0.712<br>(0.205-2.472) | 0.656<br>(0.172-2.494) |
| Network of LCS | 1.375<br>(0.479-3.951) | 1.265<br>(0.415-3.857) | 1.853<br>(0.731-4.700) | 1.193<br>(0.429-3.317) | 2.067<br>(0.563-7.591) | 1.629<br>(0.392-6.778) |

Q4: When you injected drugs, what proportion of the time did you (Q4b) give someone a syringe to use that you already injected with? (Q4d), give someone a cooker, filter or rinse water that you had previously used to inject? (Q4e), backload (piggy-back) to share injection drugs?

Factors (except for participant group) non-significantly related to injecting drug use in univariable logistic regression analysis were excluded from multivariable analysis.

Odds ratios of variables whose confidence intervals do not include 1 are shown in bold.

Abbreviations: RS, recent seeds; LCS, control seeds with long-term HIV infection.

**Table S13:** Odds ratios (OR) and 95% confidence intervals (CI) of univariable and multivariable logistic regression models for improvement in participants responses to questionnaire items of drug injection-related behaviors (safe *versus* risky) in follow-up (Q4a, Q4c, Q4e).

| Factors                                                   | Improvement of drug injection-related behaviors at follow-up |               |                                      |                                      |                                      |                                      |                         |                         |
|-----------------------------------------------------------|--------------------------------------------------------------|---------------|--------------------------------------|--------------------------------------|--------------------------------------|--------------------------------------|-------------------------|-------------------------|
|                                                           | Q4a                                                          |               | Q4c                                  |                                      | Q4e                                  |                                      |                         |                         |
|                                                           | Univariable                                                  | Multivariable | Univariable                          | Multivariable                        | Univariable                          | Multivariable                        |                         |                         |
| Gender<br>(Females vs males)                              | 0.728<br>(0.281-1.883)                                       | -             | <b>0.278</b><br><b>(0.103-0.752)</b> | <b>0.273</b><br><b>(0.100-0.745)</b> | 0.626<br>(0.226-1.731)               | -                                    |                         |                         |
| Age                                                       | 0.965<br>(0.919-1.014)                                       | -             | 0.968<br>(0.928-1.009)               | -                                    | <b>0.925</b><br><b>(0.875-0.977)</b> | <b>0.923</b><br><b>(0.871-0.976)</b> |                         |                         |
| Education<br>(Post vs up-to high School)                  | 1.175<br>(0.440-3.140)                                       | -             | 1.105<br>(0.464-2.631)               | -                                    | 1.658<br>(0.643-4.276)               | -                                    |                         |                         |
| Employment<br>(Unemployed vs employed)                    | 2.390<br>(0.685-8.336)                                       | -             | 0.468<br>(0.206-1.063)               | -                                    | 1.061<br>(0.375-3.004)               | -                                    |                         |                         |
| Homelessness<br>(Homeless vs non-homeless)                | 0.721<br>(0.259-2.010)                                       | -             | 0.969<br>(0.428-2.197)               | -                                    | 1.560<br>(0.638-3.812)               | -                                    |                         |                         |
| HIV status<br>(Positive vs negative)                      | 1.452<br>(0.729-2.894)                                       | -             | 1.165<br>(0.646-2.101)               | -                                    | 1.247<br>(0.617-2.521)               | -                                    |                         |                         |
| Participant group<br>(Reference group: Negative controls) |                                                              | RS            | 2.133<br>(0.384-11.840)              | 2.133<br>(0.384-11.840)              | 2.889<br>(0.874-9.544)               | 2.997<br>(0.884-10.164)              | 3.875<br>(0.927-16.191) | 4.013<br>(0.912-17.659) |
|                                                           |                                                              | LCS           | 3.556<br>(0.610-20.727)              | 3.556<br>(0.610-20.727)              | 1.083<br>(0.235-4.994)               | 1.098<br>(0.233-5.176)               | 2.906<br>(0.538-15.698) | 2.776<br>(0.499-15.436) |

|                |                         |                         |                        |                        |                        |                        |
|----------------|-------------------------|-------------------------|------------------------|------------------------|------------------------|------------------------|
| Network of RS  | 3.325<br>(0.935-11.827) | 3.325<br>(0.935-11.827) | 1.532<br>(0.647-3.627) | 1.565<br>(0.653-3.753) | 1.796<br>(0.566-5.698) | 1.509<br>(0.464-4.912) |
| Network of LCS | 3.429<br>(0.844-13.926) | 3.429<br>(0.844-13.926) | 1.070<br>(0.375-3.055) | 1.092<br>(0.377-3.167) | 1.808<br>(0.480-6.817) | 1.483<br>(0.382-5.751) |

---

Q4: When you injected drugs, what proportion of the time did you share a syringe that someone else had previously used to inject? (Q4a), share a cooker, filter or rinse water that someone else had previously used to inject? (Q4c), backload (piggy-back) to share injection drugs? (Q4e).

Factors (except for participant group) non-significantly related to injecting drug use in univariable analysis were excluded from multivariable analysis.

Odds ratios of variables whose confidence intervals do not include 1 are shown in bold.

Abbreviations: RS, recent seeds; LCS, control seeds with long-term HIV infection.



**Table S14:** Proportions of women sex partners, men had *safe* sex with during the past six months.

| Sociodemographic characteristics |                                                  | Women, men always used condom with [median (%); (IQR) / mean $\pm$ SD] |                 |         |                                       |                 |         |                                  |                 |         |
|----------------------------------|--------------------------------------------------|------------------------------------------------------------------------|-----------------|---------|---------------------------------------|-----------------|---------|----------------------------------|-----------------|---------|
|                                  |                                                  | Continued injecting in follow-up (n=86)                                |                 |         | Stopped injecting in follow-up (n=30) |                 |         | Not injecting at baseline (n=10) |                 |         |
|                                  |                                                  | Baseline                                                               | Follow-up       | P-value | Baseline                              | Follow-up       | P-value | Baseline                         | Follow-up       | P-value |
| Overall                          |                                                  | 50 (0-100) /                                                           | 100 (0-100) /   | 0.053   | 67 (0-100) /                          | 95 (0-100) /    | 0.837   | 0 (0-0) /                        | 58 (0-100) /    | 0.094   |
|                                  |                                                  | 49 $\pm$ 47                                                            | 59 $\pm$ 47     | 0.054   | 60 $\pm$ 43                           | 61 $\pm$ 46     | 0.933   | 10 $\pm$ 32                      | 49 $\pm$ 45     | 0.086   |
| HIV Status                       | Positive                                         | 58 (0-100) /                                                           | 100 (46-100) /  | 0.025   | 100 (100-100) /                       | 100 (100-100) / | -       | 0 (0-0) /                        | 0 (0-0) /       | -       |
|                                  |                                                  | 53 $\pm$ 47                                                            | 75 $\pm$ 43     | 0.035   | 100 $\pm$ 0                           | 100 $\pm$ 0     | -       | 0 $\pm$ .                        | 0 $\pm$ .       | -       |
|                                  | Negative                                         | 42 (0-100) /                                                           | 50 (0-100) /    | 0.607   | 67 (0-100) /                          | 80 (0-100) /    | 0.845   | 0 (0-0) /                        | 67 (0-100) /    | 0.104   |
|                                  |                                                  | 46 $\pm$ 47                                                            | 50 $\pm$ 48     | 0.543   | 55 $\pm$ 43                           | 56 $\pm$ 47     | 0.934   | 11 $\pm$ 33                      | 55 $\pm$ 44     | 0.086   |
| Participant group                | Recent seeds (RS)                                | 48 (0-100) /                                                           | 100 (100-100) / | 0.050   | 100 (100-100) /                       | 100 (100-100) / | -       | -                                | -               | -       |
|                                  |                                                  | 49 $\pm$ 54                                                            | 100 $\pm$ 0     | 0.071   | 100 $\pm$ .                           | 100 $\pm$ .     | -       | -                                | -               | -       |
|                                  | Control seeds with long-term HIV infection (LCS) | 0 (0-50) /                                                             | 0 (0-50) /      | 1.000   | 100 (100-100) /                       | 100 (100-100) / | -       | -                                | -               | -       |
|                                  |                                                  | 25 $\pm$ 50                                                            | 25 $\pm$ 50     | 1.000   | 100 $\pm$ .                           | 100 $\pm$ .     | -       | -                                | -               | -       |
|                                  | Network of RS                                    | 50 (0-100) /                                                           | 100 (0-100) /   | 0.078   | 0 (0-100) /                           | 100 (0-100) /   | 0.085   | 0 (0-0) /                        | 50 (0-75) /     | 0.161   |
|                                  |                                                  | 44 $\pm$ 44                                                            | 60 $\pm$ 47     | 0.066   | 29 $\pm$ 49                           | 62 $\pm$ 49     | 0.111   | 11 $\pm$ 33                      | 44 $\pm$ 44     | 0.169   |
|                                  | Network of LCS                                   | 100 (0-100) /                                                          | 100 (0-100) /   | 0.883   | 75 (25-100) /                         | 75 (25-100) /   | 1.000   | 0 (0-0) /                        | 100 (100-100) / | 0.317   |
|                                  |                                                  | 68 $\pm$ 45                                                            | 63 $\pm$ 48     | 0.649   | 63 $\pm$ 48                           | 63 $\pm$ 48     | 1.000   | 0 $\pm$ .                        | 100 $\pm$ .     | -       |
|                                  | Negative controls                                | 33 (0-100) /                                                           | 33 (0-100) /    | 1.000   | 67 (67-100) /                         | 80 (0-100) /    | 0.326   | -                                | -               | -       |
|                                  |                                                  | 49 $\pm$ 50                                                            | 49 $\pm$ 48     | 0.981   | 68 $\pm$ 37                           | 55 $\pm$ 48     | 0.168   |                                  |                 |         |

The Wilcoxon signed-rank test was used to test the difference of the matched pairs at baseline versus follow-up.

Abbreviations: IQR, Interquartile range; SD, standard deviation; RS, recent seeds; LCS, control seeds with long-term HIV infection.
